# Supplementary material
Source: HighWire-hosted journal article supplement (https://bmjopen.bmj.com/content/7/8/e015759)
Supplement: inline-supplementary-material-2 [file inline-supplementary-material-2.pdf]

**Supplementary Table 2. Individual hospital characteristics**

|                                                                            | Annual<br>Paediatric*<br>Trauma<br>Attendance | Annual<br>Paediatric*<br>Trauma<br>Hospitalisations |
|----------------------------------------------------------------------------|-----------------------------------------------|-----------------------------------------------------|
| <b>Lower Middle Income</b>                                                 |                                               |                                                     |
| Aga Khan University <sup>#</sup> (Pakistan)                                | 509                                           | 411                                                 |
| Hue Central Hospital <sup>#</sup><br>(Vietnam)                             | 2161                                          | 483                                                 |
| Institute of Child Health – Madras Medical<br>College <sup>#</sup> (India) | 1204                                          | 45                                                  |
| <b>Upper Middle Income</b>                                                 |                                               |                                                     |
| Beijing Children's Hospital<br>(China)                                     | 10000                                         | 1500                                                |
| Hospital Sungai Buloh<br>(Malaysia)                                        | 2892                                          | 345                                                 |
| <b>High Income</b>                                                         |                                               |                                                     |
| Dongguk University Ilsan Hospital<br>(South Korea)                         | 4489                                          | 86                                                  |
| KK Women's and Children's Hospital<br>(Singapore)                          | 28222                                         | 2197                                                |
| National University Health System<br>(Singapore)                           | 6501                                          | 708                                                 |

\*This is defined as < 16 years old

<sup>#</sup>Obtained from manual chart review
